# Supplementary material
Source: ML conference proceedings conference paper supplement (https://openaccess.thecvf.com/content/CVPR_2020/html/Li_MixNMatch_Multifactor_Disentanglement_CVPR_2020_paper.html)
Supplement: Supplementary file 2 [file Li_MixNMatch_Multifactor_Disentanglement_CVPR_2020_supplemental.zip]

Archive with 5 entries (4 files):
- 06260-supp/
- 06260-supp/MixNMatch.mp4
- 06260-supp/06260-supp.pdf
- 06260-supp/img2gif1.gif
- 06260-supp/img2gif2.gif
