# Supplementary material
Source: ML conference proceedings conference paper supplement (https://openaccess.thecvf.com/content/CVPR_2020/html/Li_MixNMatch_Multifactor_Disentanglement_CVPR_2020_paper.html)

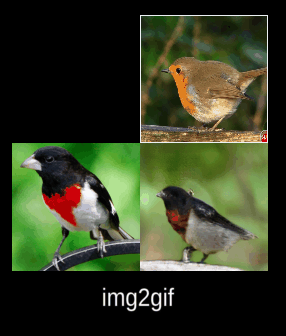

Supplement: Supplementary file 2 [file Li_MixNMatch_Multifactor_Disentanglement_CVPR_2020_supplemental.zip › 06260-supp/img2gif1.gif]

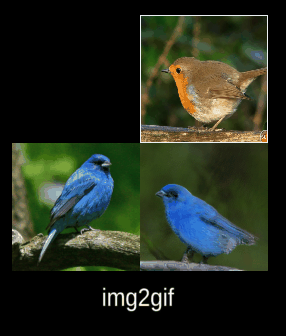

Supplement: Supplementary file 2 [file Li_MixNMatch_Multifactor_Disentanglement_CVPR_2020_supplemental.zip › 06260-supp/img2gif2.gif]
